# Supplementary material
Source: PubMed Central journal article supplement (PMC3795092)
Supplement: SD1.pdf [file SD1.pdf]

# Supplement: Modeling the Effect of Water, Sanitation, and Hygiene and Oral Cholera Vaccine Implementation in Haiti

Isaac Chun-Hai Fung,<sup>†</sup> David L. Fitter,<sup>†</sup> Rebekah H. Borse, Martin I. Meltzer, and Jordan W. Tappero\*  
*Centers for Disease Control and Prevention, Atlanta, GA*

## Supplementary Materials

### METHODS

**Summary.** We developed a spreadsheet-based static model in Excel 2010 (Microsoft, Seattle, WA) to estimate the potential number of cholera cases averted through improvements in coverage for water, sanitation and hygiene (WASH) interventions (i.e., latrines, point-of-use chlorination, and piped water), the use of oral cholera vaccine (OCV), or a combination of both. It incorporates varying incidence data from Malawi, Mozambique and India applied to Haitian demographic data to generate expected annual cholera incidence in Haiti over a 20 year period; the underlying assumption of the model is that cholera is going to be endemic in Haiti for the next 20 years.

**Demographics.** Haitian demographic data were obtained from its last census in 2003 and were extrapolated accordingly to determine a best estimate for current population size as given by Institut Haitien de Statistique et d'Informatique (February 7, 2013) (Supplemental Table 1). The current estimate suggests that the urban and rural populations of Haiti are relatively equal in size. We made projections for cholera cases in Haiti over the next 20 years, assuming a constant growth rate.

We assumed that the current urban-rural ratio would not change for the next 20 years. We understand that this assumption may not hold in the future, but for the purpose of this study, we believe that this assumption is adequate. If the percentage of urban population in Haiti continues to increase, we could have underestimated the effect of interventions in urban areas and overestimated the effect of interventions in rural areas (assuming that the coverage percentages remain the same).

**Expected annual incidence.** As cholera has been absent in Haiti for more than 100 years before the 2010 outbreak, we do not have historical endemic cholera incidence data for Haiti. Therefore, we estimate the 20-year annual incidence of endemic cholera in Haiti, by using data from Malawi in our basic scenario and by using historical data from Mozambique and India and hypothetical data in our sensitivity analyses.

**Basic scenario.** We chose 1990–2010 annual cholera incidence data for Malawi for our basic scenario because Malawi faces similar socio-economic challenges as those faced by Haiti (e.g., poor infrastructure, relatively high infant mortality rate, a large population without piped water, rates of literacy < 80%, see <https://www.cia.gov/library/publications/>

[the-world-factbook/geos/mi.html](http://www.world-factbook/geos/mi.html)). We used Malawian annual cholera incidence data as reported to the WHO (available at WHO Global Health Observatory at [http://www.who.int/gho/epidemic\\_diseases/cholera/cases/en/index.html](http://www.who.int/gho/epidemic_diseases/cholera/cases/en/index.html)) and Malawian total population data (available at Food and Agricultural Organization data, FAO website: <http://faostat3.fao.org/home/index.html#DOWNLOAD>; Choose “Elements: Total Population – Both sexes (1000)””; access on Jan 29, 2013) to calculate the annual cholera incidence rate. We then apply this rate to the projected Haitian population data to estimate the expected annual cholera incidence in Haiti for 20 years.

**Interventions modeled.** We modeled WASH and OCV interventions and interventions that combined WASH and OCV. The effect of the interventions on the two sub-populations were modeled separately, labeled WASH/U, WASH/R, OCV/U, OCV/R, Combined/U and Combined/R. The scenarios were denoted as 1, 2, and 3 for the different rate of implementation, where 1 indicated the fastest. Therefore, we have the following scenarios: WASH/U 1, WASH/U 2, WASH/U 3, WASH/R 1, WASH/R 2, WASH/R 3, OCV/U 1, OCV/U 2, OCV/U 3, OCV/R 1, OCV/R 2, OCV/R 3, Combined/U 1, Combined/U 2, Combined/R 1, and Combined/R 2. The combination scenarios were modeled separately and were not a result of combining the results of the WASH and OCV scenarios.

For WASH interventions, we chose three interventions: latrines, point-of-use chlorination of drinking water, and community piped water (standpipes). Latrines and point-of-use chlorination are short-term interventions, and community piped water a long-term solution.

**Intervention effectiveness.** For each intervention, we included a non-linear relationship between coverage and effectiveness that takes into account indirect protective effects.

**OCV.** For OCV effectiveness data, while the direct effect data from the randomized control trial (RCT) of Shanchol™ in Kolkata, India, are evident,<sup>1</sup> the indirect effect data are not (The indirect protection was evident in the geographic information system approach but not the cluster design approach<sup>2</sup>). Given that the direct effect of Shanchol™ is similar to and slightly better than Dukarol®, we considered that it was reasonable to use the simulated results of the model by Longini et al.<sup>3</sup> that fit to the Dukarol® RCT at Matlab, Bangladesh. We fit the data to a best line in the form of: effectiveness at a coverage level =  $1 - \exp(-\lambda * \text{coverage})$ , which allowed us to model both the direct and indirect (herd immunity) effect of OCV (Figure 2, Supplemental Table 2).

**WASH.** For the effectiveness data, we obtained point estimates from Cochrane reviews.<sup>4,5</sup> We assumed that these point estimates applied to a coverage level of 100%. In order to be able to compare WASH interventions with OCV, we estimated the direct and indirect effect of WASH interventions, by fitting the OCV coverage-effectiveness curve equation

---

\*Address correspondence to: Dr. Jordan W. Tappero, Centers for Disease Control and Prevention, Mailstop D-69, 1600 Clifton Road, Atlanta, GA 30333, USA. E-mail: [jwt0@cdc.gov](mailto:jwt0@cdc.gov); Phone: (404) 718-4558  
<sup>†</sup>Equal contribution, joint first authors.

SUPPLEMENTAL TABLE 1  
Demographic parameters for the model

| Description            | Value      | Reference or note                                                                                                                  |
|------------------------|------------|------------------------------------------------------------------------------------------------------------------------------------|
| Population, Haiti      |            | Direction des Statistiques Démographiques et Sociales, Institut Haïtien de Statistique et d'Informatique (obtained on Feb 7, 2013) |
| Urban                  | 5,154,940  |                                                                                                                                    |
| Rural                  | 5,258,271  |                                                                                                                                    |
| Total                  | 10,413,211 |                                                                                                                                    |
| Population growth rate | 0.89%      | CIA fact book estimate 2012                                                                                                        |
| Discount rate          | 3%         | Assumption                                                                                                                         |

to the WASH interventions' point estimates to obtain an estimate of  $\lambda$  and therefore, a coverage-effective curve for each WASH intervention: effectiveness at a coverage level =  $1 - \exp(-\lambda * \text{coverage})$  (Figure 2, Supplemental Table 2). In our model, piped water confers the strongest protection, followed by point-of-use chlorination, and then latrines.

**Intervention coverage over time. WASH.** We assumed that in the first 5 years of implementation, resources would primarily be allocated towards point-of-use chlorination. Extension of piped water would only begin in year 6. Given that the evidence for aggregated effects of multiple WASH interventions is debatable, we assumed no additive effects for multiple WASH interventions applied simultaneously.<sup>6,7</sup> In our model, for example, if 10% of the population uses latrines and point-of-use chlorination, the protection conferred by both interventions will be the same as point-of-use chlorination only. Therefore, using a stepwise introduction of interventions over time, the intervention with the stronger protective effect supplanted the other.

We also input the annual coverage of the three WASH interventions being studied. For each year, x% of the population would be covered by piped water (and point-of-use chlorination and/or latrines, or none), y% of the population would be covered by point-of-use chlorination (and latrines or none, but not piped water), z% of population would be covered by latrines only, and  $(100-x-y-z)\%$  of the population received no WASH interventions.

The intervention effects were then taken from the coverage-effectiveness curves. For the coverage attained by year 0, 5, and 20 for different scenarios (Tables 1–3). We assumed that 5 people would share 1 latrine and 50 people would share 1 standpipe. Supplemental Table 3 provides the corresponding figures for the estimated number of latrines built, number of people covered by point-by-use chlorination intervention, and number of standpipe constructed in the different scenarios as described in the main text.

SUPPLEMENTAL TABLE 2  
Parameters for coverage-effectiveness curve equations for various interventions

|                           | $\lambda$ | Effect estimate (at 100% coverage) | Reference / Assumption                                         |
|---------------------------|-----------|------------------------------------|----------------------------------------------------------------|
| OCV                       | 4.6975    | -                                  | Curve fitted to modeling output of Longini et al. <sup>3</sup> |
| Piped water               | 2.3019    | 90%                                | Assumption. Sensitivity analysis performed.                    |
| Point-of-use chlorination | 1.0788    | 66%                                | CI, 32% – 83% <sup>4</sup>                                     |
| Latrines                  | 0.3425    | 29%                                | CI, 8% – 46% <sup>5</sup>                                      |

OCV = oral cholera vaccine; CI = Confidence interval.

**OCV.** An OCV study has been implemented in Haiti using the Shanchol™ vaccine.<sup>8,9</sup> The vaccine requires two doses to achieve its expected effect. In our model, we assume that people were effectively immunized by two doses. We did not examine partial vaccination effect (i.e., receiving only one dose).

Next we input the annual coverage of interventions for the model from year 0 to year 20. We modeled the effective coverage of OCV. Supplemental Table 4 provides the corresponding figures for the estimated number of number of doses of OCV needed in the different scenarios as described in the main text. We assumed that a booster dose is provided every three years to a previously vaccinated individual if he or she remains effectively covered.

**Combined WASH and OCV.** For the combined scenarios, we assumed that (a) people who would receive OCV would be those who would not be covered by any WASH interventions and vice versa; (b) the coverage of WASH and OCV would never exceed 50% respectively; (c) OCV coverage would increase at a constant rate from baseline to year 5 and then decrease at a constant rate from year 6 onwards; (d) latrines coverage would remain the same from baseline to year 5; (e) point-of-use chlorination will increase from baseline onwards; and (f) piped water will increase only from year 6 onwards at a constant rate.

We modeled an initial increase in OCV coverage, followed by a decrease after year 5 because we believed that OCV, which requires a booster every few years to maintain its effective coverage in the population, would not be a permanent solution to the cholera epidemic in Haiti.

**Number of cases averted.** We calculated for each year the cases averted by multiplying the protective effect of the intervention(s) at a given coverage in that year with the total expected number of cases in the same year. We calculated the cumulative number of cases averted by summing up the cases averted of each year with a discount rate of 3% per year. Discounting is applied to account for differential timing of costs and benefits.<sup>10</sup>

Given the static nature of the model, for each scenario, the number of cases averted for each year is the result of the direct and indirect effects of interventions applied in that year. However, this model does not take into account the effect of any interventions applied this year in the future.

**Uncertainty and sensitivity analyses.** To assess the robust nature of our model, we performed sensitivity/uncertainty analyses in three steps.

**Varying baseline incidence rates.** First, we applied different baselines (first, historical annual incidence data from Mozambique and India; second, hypothetical annual incidence data) to the Haitian demographic data for the expected number of cholera cases to illustrate how a change in the input of the annual incidence data will change our results.

(a) Historical scenarios (Supplemental Figure 1). As part of our sensitivity analyses, we used 1990–2010 historical cholera incidence data for Mozambique and 1961–1981 data India from, as reported to WHO, to represent a higher and a lower mean incidence respectively. (The data sources are the same as the Malawian data for the Basic scenario.)

(b) Hypothetical scenarios (Supplemental Figure 2). We also created three hypothetical scenarios as part of our

SUPPLEMENTAL TABLE 3

## WASH scenarios\*

|                                                                                   | WASH/U 1   | WASH/U 2   | WASH/U 3   | WASH/R 1   | WASH/R 2   | WASH/R 3   | Combined/U 1 | Combined/U 2 | Combined/R 1 | Combined/R 2 |
|-----------------------------------------------------------------------------------|------------|------------|------------|------------|------------|------------|--------------|--------------|--------------|--------------|
| No. of latrines at baseline                                                       | 103,099    | 103,099    | 103,099    | 105,165    | 105,165    | 105,165    | 103,099      | 103,099      | 105,165      | 105,165      |
| New latrines built from Year 1 to 5                                               | 13,896     | 13,896     | 13,896     | 655,997    | 340,086    | 14,175     | 13,896       | 13,896       | 14,175       | 14,175       |
| New latrines built from Year 6 to 20                                              | 0          | 5,617      | 72,448     | 1,375,322  | 2,823,002  | 193,421    | 0            | 0            | 0            | 0            |
| People covered by point-of-use chlorination but not piped water at baseline       | 1,303,988  | 1,303,988  | 1,303,988  | 1,367,150  | 1,367,150  | 1,367,150  | 1,030,988    | 1,030,988    | 1,367,150    | 1,367,150    |
| People covered by point-of-use chlorination but not piped water from year 1 to 5  | 14,879,093 | 11,684,030 | 8,488,967  | 9,301,403  | 7,671,849  | 7,671,849  | 6,891,436    | 6,891,436    | 7,671,849    | 7,671,849    |
| People covered by point-of-use chlorination but not piped water from year 6 to 20 | 47,411,582 | 57,698,084 | 59,823,792 | 42,884,184 | 32,347,291 | 32,347,291 | 15,495,258   | 26,979,233   | 15,605,609   | 26,899,202   |
| No. of standpipes at baseline                                                     | 10,310     | 10,310     | 10,310     | 0          | 0          | 0          | 1,303,988    | 1,303,988    | 0            | 0            |
| New standpipe built from year 1 to 5                                              | 1,390      | 1,390      | 1,390      | 0          | 0          | 0          | 1,390        | 1,390        | 0            | 0            |
| New standpipe built from year 6 to 20                                             | 633,222    | 396,968    | 113,464    | 674,771    | 481,979    | 240,990    | 396,968      | 160,714      | 481,979      | 240,990      |

\*Number of latrines, number of people covered by point-of-use chlorination and number of standpipes at the baseline coverage and the coverage for year 5 and 20. We assume that 5 people share one latrine and 50 people share one standpipe (without discounting).

R = rural; U = urban; WASH = water, sanitation, and hygiene.

sensitivity analyses: stable incidence, growing incidence, and declining incidence. These helped us determine whether the increasing or declining annual incidence changes our results. These hypothetical scenarios were created by first picking a mean from the mean incidence of one of the four historical scenarios (mean) and then

choosing a variation level ( $v$ ). For the growing and declining scenarios, we choose a growing rate ( $rate_1$ ) and a declining rate ( $rate_2$ ), respectively. In our sensitivity analyses, we chose the mean of the Malawian incidence data,  $v = 20\%$ ,  $rate_1 = 10\%$  and  $rate_2 = 10\%$ . We use the RAND function in Excel to choose a random number

SUPPLEMENTAL TABLE 4

## Number of doses of OCV needed in a particular year for different scenarios

| Year | OCV/U - 1 | OCV/U - 2 | OCV/U - 3 | OCV/R - 1 | OCV/R - 2 | OCV/R - 3 | Combined/U 1 | Combined/U 2 | Combined/R 1 | Combined/R 2 |
|------|-----------|-----------|-----------|-----------|-----------|-----------|--------------|--------------|--------------|--------------|
| 0    | 103,099   | 103,099   | 103,099   | 105,165   | 105,165   | 105,165   | 103,099      | 103,099      | 105,165      | 105,165      |
| 1    | 937,044   | 312,958   | 104,930   | 955,827   | 319,232   | 107,033   | 312,958      | 104,930      | 319,232      | 107,033      |
| 2    | 1,058,616 | 423,446   | 211,723   | 1,079,836 | 431,934   | 215,967   | 423,446      | 211,723      | 431,934      | 215,967      |
| 3    | 1,128,885 | 482,483   | 267,016   | 1,151,513 | 492,155   | 272,369   | 482,483      | 267,016      | 492,155      | 272,369      |
| 4    | 1,616,375 | 646,550   | 323,275   | 1,648,775 | 659,510   | 329,755   | 646,550      | 323,275      | 659,510      | 329,755      |
| 5    | 2,164,903 | 865,961   | 432,981   | 2,208,298 | 833,319   | 441,660   | 865,961      | 432,981      | 883,319      | 441,660      |
| 6    | 1,925,799 | 944,264   | 435,894   | 1,779,578 | 815,333   | 444,631   | 545,641      | 254,702      | 556,579      | 259,807      |
| 7    | 2,479,525 | 1,168,844 | 547,540   | 2,341,120 | 1,041,788 | 558,515   | 763,141      | 363,130      | 778,438      | 370,409      |
| 8    | 3,042,932 | 1,397,337 | 661,134   | 2,912,495 | 1,272,200 | 674,387   | 984,461      | 473,463      | 1,004,194    | 482,954      |
| 9    | 3,217,527 | 1,557,319 | 722,345   | 2,994,807 | 1,358,764 | 736,825   | 937,863      | 440,774      | 956,662      | 449,609      |
| 10   | 3,394,983 | 1,720,033 | 784,592   | 3,078,352 | 1,446,764 | 800,319   | 890,359      | 407,467      | 858,815      | 415,635      |
| 11   | 3,575,338 | 1,885,513 | 847,886   | 3,163,144 | 1,536,220 | 864,882   | 841,938      | 373,534      | 808,474      | 381,021      |
| 12   | 3,758,627 | 2,053,797 | 912,243   | 3,249,200 | 1,627,151 | 930,529   | 792,587      | 338,966      | 757,172      | 345,760      |
| 13   | 3,944,890 | 2,224,921 | 977,676   | 3,336,534 | 1,719,575 | 997,274   | 742,293      | 303,754      | 704,895      | 309,843      |
| 14   | 4,134,164 | 2,398,922 | 1,044,199 | 3,425,164 | 1,813,513 | 1,065,130 | 691,043      | 267,891      | 651,629      | 273,260      |
| 15   | 4,326,489 | 2,575,838 | 1,111,827 | 3,515,104 | 1,908,983 | 1,134,113 | 638,824      | 231,366      | 597,363      | 236,004      |
| 16   | 4,521,903 | 2,755,707 | 1,180,573 | 3,636,371 | 2,006,006 | 1,204,238 | 585,624      | 194,172      | 542,081      | 198,064      |
| 17   | 4,720,447 | 2,938,567 | 1,250,453 | 3,698,983 | 2,104,601 | 1,275,518 | 531,428      | 156,299      | 542,081      | 159,432      |
| 18   | 4,922,161 | 3,124,457 | 1,321,480 | 3,792,954 | 2,204,790 | 1,347,969 | 476,224      | 117,738      | 485,770      | 120,098      |
| 19   | 5,127,084 | 3,313,417 | 1,393,670 | 3,888,303 | 2,306,591 | 1,421,606 | 419,997      | 78,479       | 428,416      | 80,053       |
| 20   | 5,335,259 | 3,505,487 | 1,467,039 | 3,985,046 | 2,410,027 | 1,496,445 | 362,734      | 38,515       | 370,005      | 39,287       |

OCV = oral cholera vaccine; R = Rural; U = Urban.

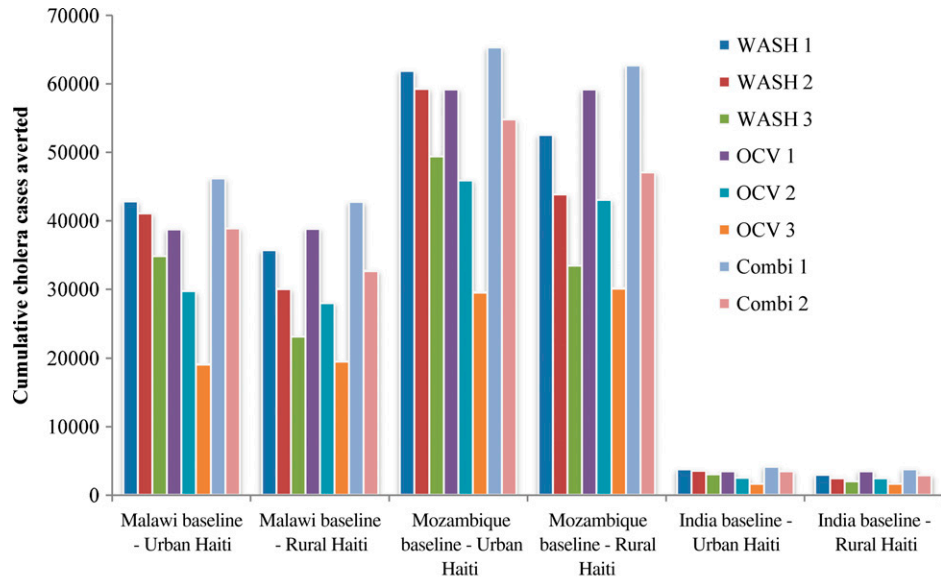

**Baseline incidence rate of a country as applied to Urban / Rural Haiti**

SUPPLEMENTAL FIGURE 1. Cumulative cases of cholera averted by WASH interventions and/or OCV in Haiti in 20 years, assuming a baseline national incidence rate of Malawi (1990–2010), Mozambique (1990–2010), and India (1961–1981) as applied to urban and rural Haiti. WASH = water, sanitation, and hygiene; OCV = oral cholera vaccine; Combi = combination of WASH and OCV.

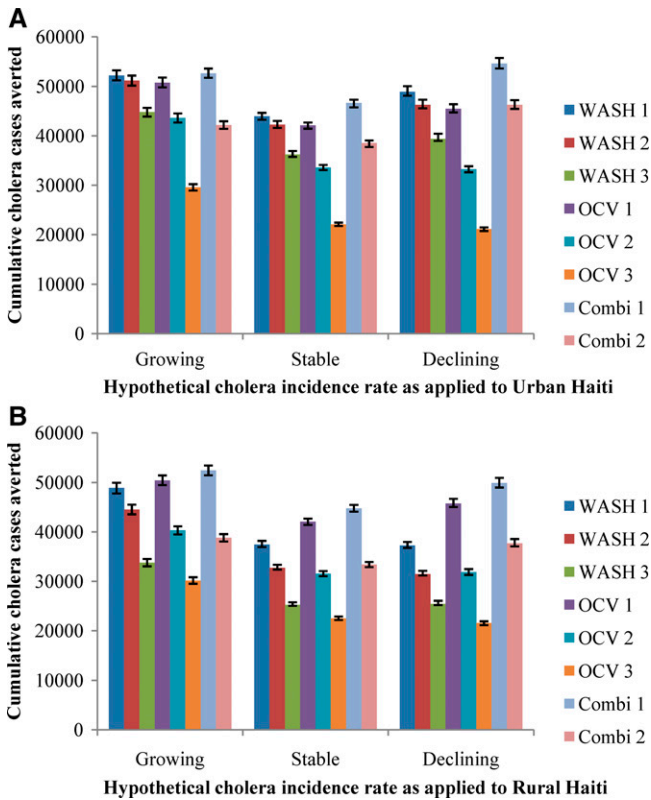

SUPPLEMENTAL FIGURE 2. Cumulative cases of cholera averted by WASH interventions and/or OCV in Haiti in 20 years, assuming hypothetical baseline national incidence rates – growing, stable, or declining as applied to (A) urban and (B) rural Haiti. The mean = mean of national incidence rate in Malawi (1990–2010). Growing rate: 10%; Declining rate: 10%; Random variation by 20%. WASH = water, sanitation, and hygiene; OCV = oral cholera vaccine; Combi = combination of WASH and OCV.

(rand) from a uniform distribution between 0 and 1 to generate stochasticity in the model. For the stable scenario, the incidence for each year =  $(\text{rand}^2 * v + 1 - v) * \text{mean}$ . For the growing and declining scenarios, the incidence for each year is calculated using the equations in Supplemental Table 5.

*Uncertainty of protective effect of WASH.* Second, we ran an uncertainty analysis for different estimates of the protective effectiveness data at 100% coverage against cholera of the three WASH interventions, namely latrines (Supplemental Figure 3), point-of-use chlorination (Supplemental Figure 4), and community piped water (Supplemental Figure 5). The coverage-effectiveness curves changed (change in  $\lambda$ ) accordingly. The ranges are as follows: latrines: 8% (lower 95% confidence interval [CI]) and 46% (higher 95% CI) (Supplemental Figure 3); point-of-use chlorination: 32% (lower 95% CI), and 83% (higher 95% CI) (Supplemental Figure 4).

SUPPLEMENTAL TABLE 5

Equations for the baseline incidence for the hypothetical growing and declining incidence scenarios\*

|                              | Year     | Baseline incidence                                                    |
|------------------------------|----------|-----------------------------------------------------------------------|
| Growing incidence scenario   | 0 to 9   | $= (\text{rand}^2 * v + 1 - v) * \text{mean} / (1 + \text{rate}_1)^n$ |
|                              | 10       | $= (\text{rand}^2 * v + 1 - v) * \text{mean}$                         |
|                              | 11 to 20 | $= (\text{rand}^2 * v + 1 - v) * \text{mean} * (1 + \text{rate}_1)^n$ |
| Declining incidence scenario | 0 to 9   | $= (\text{rand}^2 * v + 1 - v) * \text{mean} * (1 + \text{rate}_2)^n$ |
|                              | 10       | $= (\text{rand}^2 * v + 1 - v) * \text{mean}$                         |
|                              | 11 to 20 | $= (\text{rand}^2 * v + 1 - v) * \text{mean} / (1 + \text{rate}_2)^n$ |

\*The hypothetical annual incidence scenarios were created by first picking a mean from the mean incidence of one of the four historical scenarios (mean) and then choosing a variation level (v). For the growing and declining scenarios, we choose a growing rate ( $\text{rate}_1$ ) and a declining rate ( $\text{rate}_2$ ) respectively. We use the RAND function in Excel to choose a random number (rand) between 0 and 1 to generate stochasticity in the model. n refers to the absolute number of difference between year 10 and a particular year. For example, for year 8, n = 2.

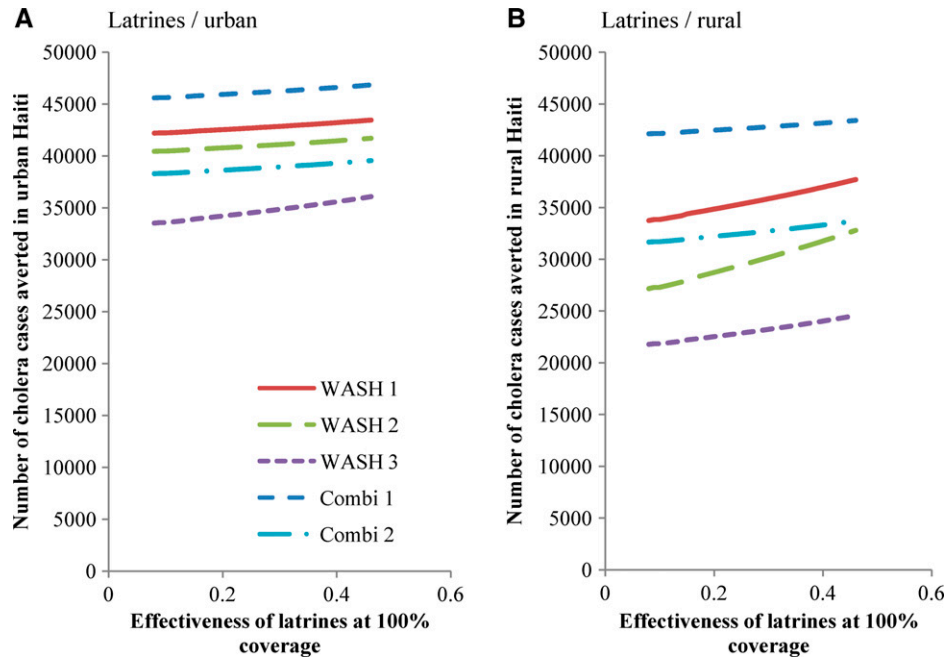

SUPPLEMENTAL FIGURE 3. The number of cholera cases averted by WASH scenarios 1, 2, and 3 and Combined WASH and OCV scenarios 1 and 2 in (A) urban and (B) rural Haiti as the protective effectiveness of latrines changes respectively. WASH = water, sanitation, and hygiene; OCV = oral cholera vaccine; Combi = combination of WASH and OCV.

Figure 4); piped water 90% (the default value) and 100% (complete protection) (Supplemental Figure 5).

*Varying coverage / implementation rate.* We then proceeded to study the effect of the variation of the coverage/implementation rate. First, we performed sensitivity analysis for WASH interventions and OCV interventions for urban (Supplemental Figure 6) and rural (Supplemental Figure 7)

Haiti and then for combined interventions for urban (Supplemental Figure 8) and rural (Supplemental Figure 9) Haiti.

(a) *OCV uncertainty/sensitivity analyses.* As explained in the main text; see Supplemental Figures 6A and 7A. (Note: in the main scenarios, the rate of increase in the first 5 years can be different from that in the later 15 years.)

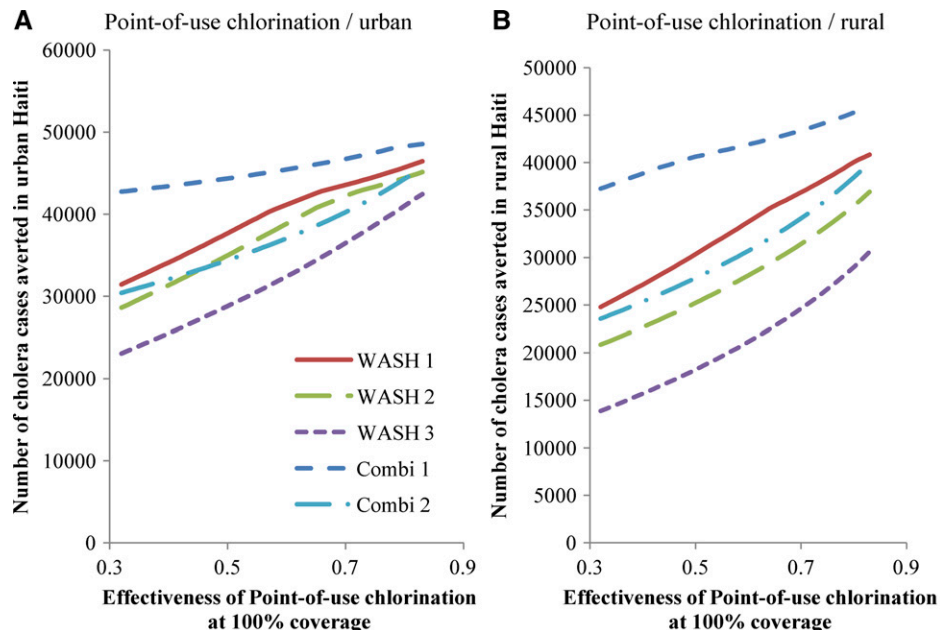

SUPPLEMENTAL FIGURE 4. The number of cholera cases averted by WASH scenarios 1, 2, and 3 and Combined WASH and OCV scenarios 1 and 2 in (A) urban and (B) rural Haiti as the protective effectiveness of point-of-use chlorination changes respectively. WASH = water, sanitation, and hygiene; OCV = oral cholera vaccine; Combi = combination of WASH and OCV.

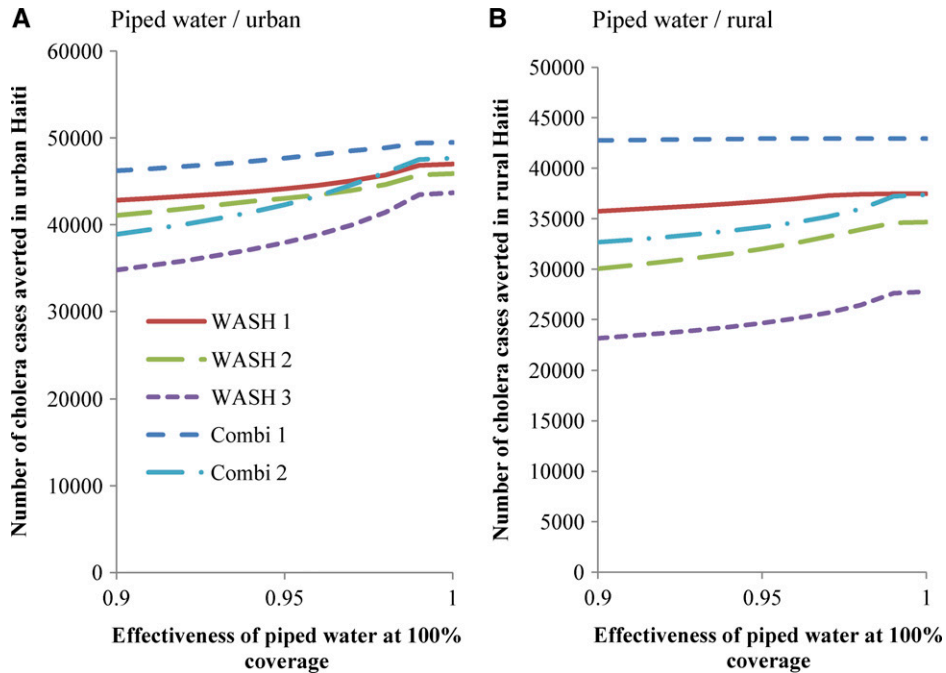

SUPPLEMENTAL FIGURE 5. The number of cholera cases averted by WASH scenarios 1, 2, and 3 and Combined WASH and OCV scenarios 1 and 2 in (A) urban and (B) rural Haiti as the protective effectiveness of piped water changes respectively. WASH = water, sanitation, and hygiene; OCV = oral cholera vaccine; Combi = combination of WASH and OCV.

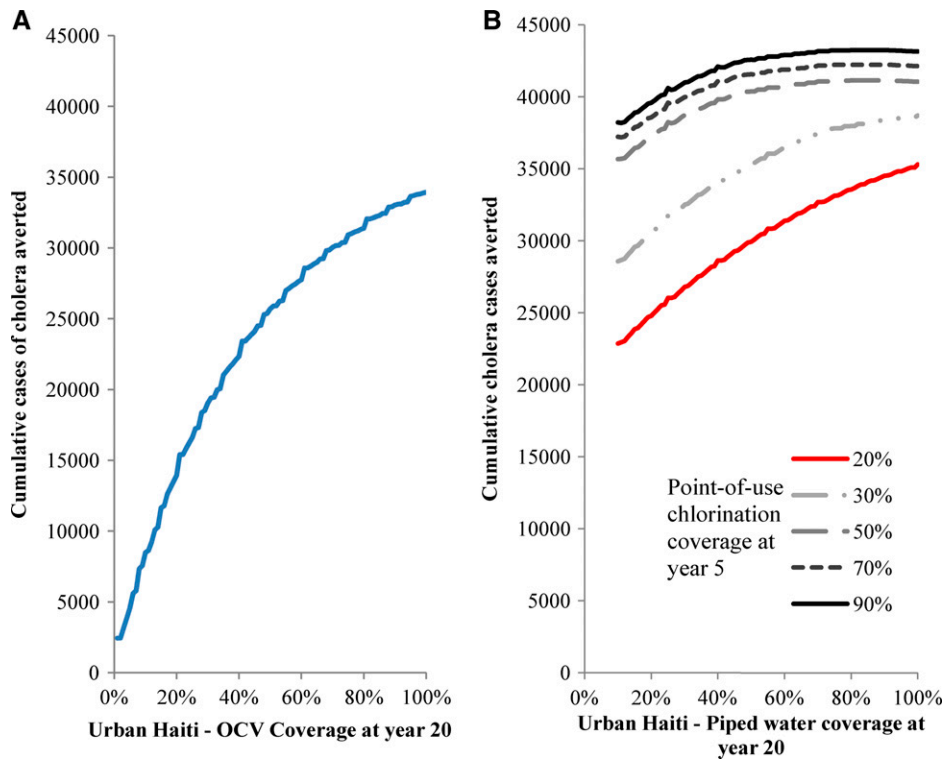

SUPPLEMENTAL FIGURE 6. Sensitivity analysis: Cumulative cases of cholera averted (20 years) in Urban Haiti. (A): OCV coverage at year 20, assuming that OCV coverage increases linearly for 20 years. (B): WASH interventions: Piped water coverage at year 20 (x-axis), assuming that starting in year 6, it begins to increase from its baseline of 10%. The different lines indicate different point-of-use chlorination coverage at year 5: Red line (20%; i.e., the baseline); light grey line-dot-dot (30%); broken grey line (50%); dotted dark grey line (70%); black line (90%). Latrine coverage remained the same (10%) for the first five years as in the baseline. In subsequent years, latrines will be taken over by point-of-use chlorination and piped water (i.e. people using latrines will be covered by another WASH interventions too). WASH = water, sanitation, and hygiene; OCV = oral cholera vaccine.

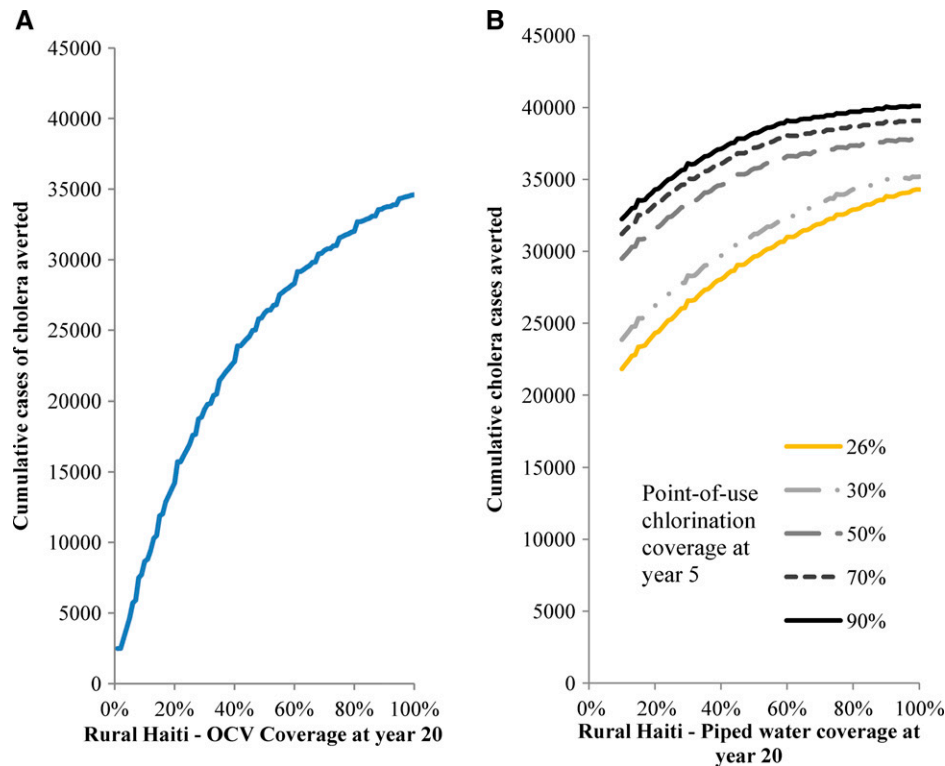

SUPPLEMENTAL FIGURE 7. Sensitivity analysis: Cumulative cases of cholera averted (20 years) in Rural Haiti. (A) OCV coverage at year 20, assuming that OCV coverage increases linearly for 20 years. (B) WASH interventions: Piped water coverage at year 20 (x-axis), assuming that starting in year 6, it begins to increase from its baseline of 10%. The different lines indicate different point-of-use chlorination coverage at year 5: Yellow line (0.26; i.e. the baseline); light grey line-dot-dot (0.3); broken grey line (0.5); dotted dark grey line (0.7); black line (0.9). We assume that latrine coverage increased at a constant rate from 10% at the baseline to 30% at year 5. Latrine coverage continues to increase at a constant rate in subsequent years until it is taken over by point-of-use chlorination or piped water (i.e. people using latrines will be covered by another WASH interventions too). WASH = water, sanitation, and hygiene; OCV = oral cholera vaccine.

- (b) *WASH uncertainty/sensitivity analyses.* As explained in the main text; see Supplemental Figures 6B and 7B.
- (c) *Combined WASH and OCV uncertainty/sensitivity analyses.* As explained in the main text; see Supplemental Figures 8 and 9. Note: Figure 5 in the main text presents the national estimates for the second scenario (Combined/U 2 + Combined/R 2).

## RESULTS

In addition to the results we present in the main text, we have performed additional analyses. Their results are presented below.

We compare the results that take into account direct intervention effect only with those that take both direct and indirect results into account. Using scenarios WASH/U 1, WASH/R 1, OCV/U 1 and OCV/R 1 as examples, Supplemental Table 6 shows that if we do not account for indirect effect, the effect of both WASH interventions and OCV will be underestimated, as expected.

**Uncertainty and sensitivity analyses.** To test the robustness of our model, we performed the following sensitivity/uncertainty analyses.

*Uncertainty in the expected annual incidence.*

- (a) *Historical scenarios.* We compared the cumulative cases of cholera averted for a 20-year period with different

historical baselines: Malawi (1990–2010), Mozambique (1990–2010), and India (1961–1981) as they were applied to the Haitian demographic data (Table 4 and Supplemental Figure 1). With a high baseline incidence rate (Mozambique scenario), the number of cases averted would be high. Similarly, the cases averted would be few, if the baseline was low (India scenario).

- (b) *Hypothetical scenarios.* Sensitivity analysis was performed for three sets of hypothetical baseline cholera incidence curves over a 20-year period. The results shown in Supplemental Figure 2 indicate that the cumulative cholera cases averted would be similar whether the trend was growing, stable, or declining (assuming the same mean incidence over 20 years). In other words, our results were not sensitive to the direction of the 20-year secular trend of cholera incidence.

Given that the model was a static model and that the protection offered by the invention was calculated as a proportion of the expected cholera incidence, the relative magnitude of the number of cases averted across the scenarios would be the same, regardless of the baseline incidence.

*Uncertainty of protective effect of WASH.* We have also completed an uncertainty analysis of the coverage-effectiveness curves of the three WASH interventions modeled, namely latrines (Supplemental Figure 3), point-of-use chlorination (Supplemental Figure 4), and community piped water

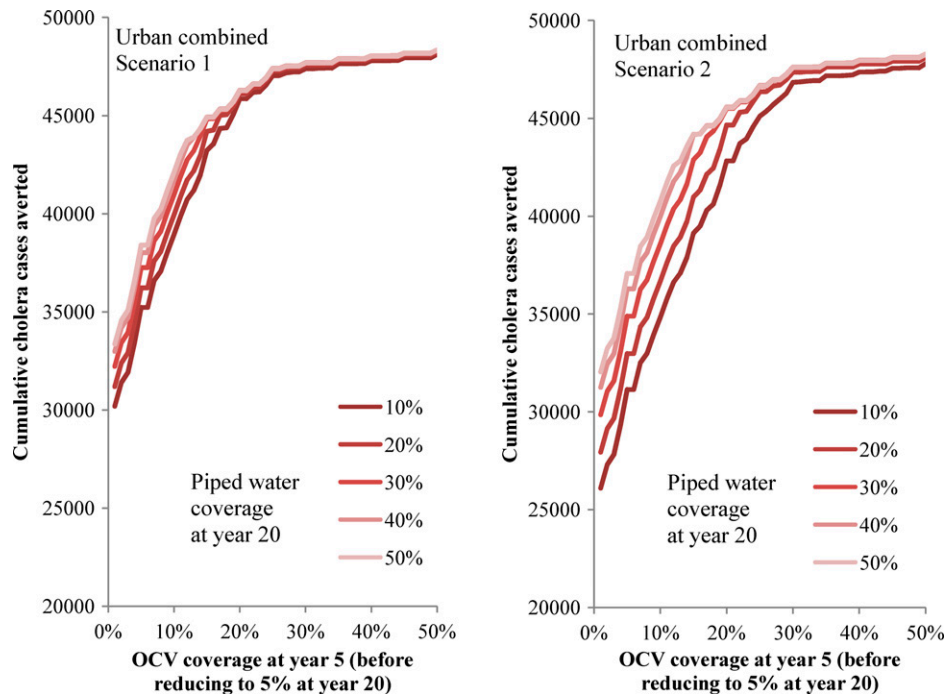

SUPPLEMENTAL FIGURE 8. Cumulative cholera cases averted in 20 years (y-axis) in the combined intervention scenarios 1 and 2 in urban Haiti. The x-axis refers to OCV coverage at year 5 and the different lines (of varying darkness) refer to piped water coverage at year 20. WASH = water, sanitation, and hygiene; OCV = oral cholera vaccine.

Assumptions: 1. WASH interventions and oral cholera vaccine (OCV) coverages never exceed 50% respectively and that people who receive WASH do not receive OCV or vice versa (i.e., OCV are allocated towards people who are not covered by WASH interventions); 2. Point-of-use chlorination remains at 20% (Urban) and will remain the same (Scenario 2) or increases from 20% increase to 30% at year 5 and will continue to increase (Scenario 1) until piped water takes over (provided assumption 1 met). 3. Latrines coverage remains 10% until it was taken over by point-of-use chlorination and/or piped water. 4. Piped water baseline = 10% in urban areas. Piped water coverage starts increasing at a constant rate from year 6 onwards. 5. OCV coverage peaks at year 5 and declines afterwards and reaches 5% at year 20.

(Supplemental Figure 5) at 100% coverage against cholera. We found that the uncertainty around the magnitude of the protective effect does not alter our results in any significant way.

*Uncertainty of rate of implementation and extent of coverage.*

(a) *OCV.* Through the sensitivity analysis for OCV interventions (Supplemental Figures 6A and 7A), consistent with our main findings, we found that varying the rate of implementation of OCV campaign (as indicated by the final coverage attained in year 20) would change the number of cumulative cases of cholera averted by tens of thousands.

(b) *WASH.* For the sensitivity analysis for WASH interventions (Supplemental Figures 6B and 7B), we found that extending the coverage of point-of-use chlorination to a large segment of the population early (in the first 5 years) would avert a large number of cholera cases. The marginal returns of investment in piped water were not as high as we would expect. The explanation is that most cases would have been averted by point-of-use chlorination (assuming a high coverage has been achieved at year 5 and that its compliance can be maintained for years). Therefore, the additional benefit of piped water in terms of averted cholera cases may not be as pronounced as one would expect. However,

piped water is still a valuable intervention, as compliance to point-of-use chlorination may be limited.<sup>11-13</sup>

(c) *Combined WASH and OCV.* We have also completed the sensitivity analysis for the scenarios of combined WASH and OCV interventions. Figure 5 in the main text presents the national estimates for the second combined scenario (Combined/U 2 + Combined/R 2). Supplemental Figures 8 and 9 present the data for urban and rural areas separately. Comparing Combined/U 1 and 2 scenarios in the sensitivity analysis (Supplemental Figure 8), we can identify the contribution of point-of-use chlorination, as it increase from a baseline of 20% to 30% at year 5 in scenario 1 while in scenario 2, it remains 20%. Similar observation can be made in the sensitivity analysis comparing Combined/R 1 and 2 scenarios (Supplemental Figure 9). Our sensitivity analyses results demonstrated diminishing returns on investment (marginal increase of the number of cholera cases averted) when both OCV coverage at year 5 and piped water coverage at year 20 were high. OCV coverage at 30% achieved similar outcomes with that at 50% (regardless of piped water coverage between 10% and 50% at year 20) (Figure 5 and Supplemental Figures 8 and 9). Additional sensitivity analyses were done for two specific sets of scenarios: We found that as (a) effective OCV coverage increases at a constant rate from 1%



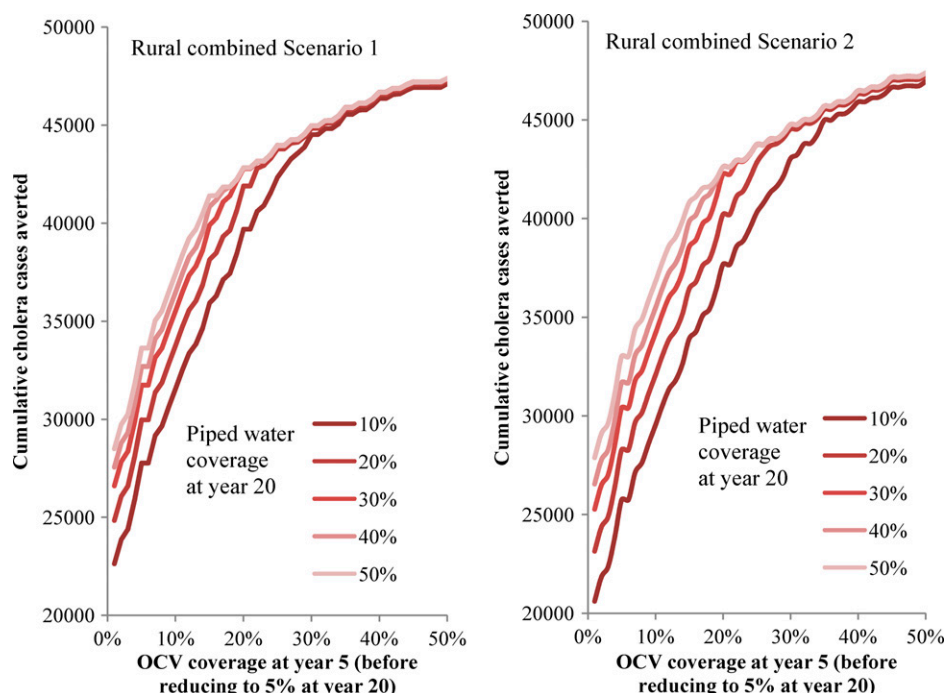

SUPPLEMENTAL FIGURE 9. Cumulative cholera cases averted in 20 years (y-axis) in the combined intervention scenarios 1 and 2 in rural Haiti. The x-axis refers to OCV coverage at year 5 and the different lines (of varying darkness) refer to piped water coverage at year 20. WASH = water, sanitation, and hygiene; OCV = oral cholera vaccine.

Assumptions: 1. WASH interventions and oral cholera vaccine (OCV) coverages never exceed 50% respectively and that people who receive WASH do not receive OCV or vice versa (i.e., OCV are allocated towards people who are not covered by WASH interventions); 2. Point-of-use chlorination remains at 26% (Rural) and will remain the same (Scenario 2) or increases from 26% increase to 30% at year 5 and will continue to increase (Scenario 1) until piped water takes over (provided assumption 1 met). 3. Latrines coverage remains 10% until it was taken over by point-of-use chlorination and/or piped water. 4. Piped water baseline = 0% in rural areas. Piped water coverage starts increasing at a constant rate from year 6 onwards. 5. OCV coverage peaks at year 5 and declines afterwards and reaches 5% at year 20.

baseline at year 0, to 50% at year 5, and then decreases at a constant rate to 5% at year 20, cumulative cases of cholera averted over 20 years were 48337 (Combined/U 1), 48264 (Combined/U 2), 47375 (Combined/R 1), and 47374 (Combined/R 2) (Table 5) and (b) effective OCV coverage increases at a constant rate from 1% baseline at year 0, to 50% at year 5, and maintaining 50% coverage up to year 20, the cumulative cases of cholera averted over 20 years would be 48371 (Combined/U 1), 48298 (Combined/U 2), 47406 (Combined/R 1), and 47405 (Combined/R 2) respectively (Table 5). Comparing

to main combined scenarios as described in Table 3 in the main text (where effective OCV coverage was 10% or 20%), rapid increase in the effective OCV coverage to 50% at year 5 would avert 2,124 to 9,276 more cases in the urban areas and 4,614 to 14,657 more cases in the rural areas. However, when we allowed for effective OCV coverage to reach 50% by year 5 and remain at that level to year 20 (i.e. no decline) (Table 5), we estimated very few additional cases averted: 31 to 34 more cases averted in the urban areas and 75 to 109 more cases averted in the rural areas.

SUPPLEMENTAL TABLE 6  
The effect of indirect effect\*

| Baseline incidence rate as applied to Haiti | U/R Haiti | Direct effect only |         | Direct and indirect effect |         | Difference |        |
|---------------------------------------------|-----------|--------------------|---------|----------------------------|---------|------------|--------|
|                                             |           | WASH 1             | OCV 1   | WASH 1                     | OCV 1   | WASH 1     | OCV 1  |
| Malawi (1990–2010)                          | U         | 31,423             | 13,050  | 42,828                     | 38,793  | 11,405     | 25,743 |
|                                             | R         | 25,874             | 11,578  | 35,739                     | 38,843  | 9,866      | 27,266 |
|                                             | Total     | 57,297             | 24,628  | 78,568                     | 77,636  | 21,271     | 53,008 |
| Mozambique (1990–2010)                      | U         | 47,661             | 20,542  | 61,879                     | 59,223  | 14,218     | 38,681 |
|                                             | R         | 38,403             | 18,099  | 52,541                     | 59,229  | 14,139     | 41,130 |
|                                             | Total     | 86,064             | 38,640  | 114,420                    | 118,451 | 28,356     | 79,811 |
| India (1961–1981)                           | U         | 2,730              | 1,091   | 3,711                      | 3,421   | 982        | 2,330  |
|                                             | R         | 2,135              | 989,001 | 2,911                      | 3,437   | 776        | 2,448  |
|                                             | Total     | 4,865              | 2,080   | 6,623                      | 6,858   | 1,758      | 4,779  |

\* Cumulative cases averted in Haiti in 20 years by WASH scenario 1 and OCV scenario 1. Assumption: underreporting multiplier = 1; OCV = oral cholera vaccine; WASH = water, sanitation, and hygiene; R = Rural; U = Urban.

## REFERENCES

1. Sur D, Kanungo S, Sah B, Manna B, Ali M, Paisley AM, Niyogi SK, Park JK, Sarkar B, Puri MK, Kim DR, Deen JL, Holmgren J, Carbis R, Rao R, Nguyen TV, Han SH, Attridge S, Donner A, Ganguly NK, Bhattacharya SK, Nair GB, Clemens JD, Lopez AL, 2011. Efficacy of a low-cost, inactivated whole-cell oral cholera vaccine: results from 3 years of follow-up of a randomized, controlled trial. *PLoS Negl Trop Dis* 5: e1289.
2. Ali M, Sur D, You YA, Kanungo S, Sah B, Manna B, Puri M, Wierzba TF, Donner A, Nair GB, Bhattacharya SK, Dhingra MS, Deen JL, Lopez AD, Clemens J, 2013. Herd Protection by a Bivalent Killed Whole-Cell Oral Cholera Vaccine in the Slums of Kolkata, India. *Clin Infect Dis* 56: 1123–1131.
3. Longini IM, Jr., Nizam A, Ali M, Yunus M, Shenvi N, Clemens JD, 2007. Controlling endemic cholera with oral vaccines. *PLoS Med* 4: e336.
4. Clasen T, Roberts I, Rabie T, Schmidt W, Cairncross S, 2006. Interventions to improve water quality for preventing diarrhoea. *Cochrane Database Syst Rev* 3: CD004794.
5. Clasen TF, Bostoen K, Schmidt WP, Boisson S, Fung IC, Jenkins MW, Scott B, Sugden S, Cairncross S, 2010. Interventions to improve disposal of human excreta for preventing diarrhoea. *Cochrane Database Syst Rev*: CD007180.
6. Fewtrell L, Kaufmann RB, Kay D, Enanoria W, Haller L, Colford JM, Jr., 2005. Water, sanitation, and hygiene interventions to reduce diarrhoea in less developed countries: a systematic review and meta-analysis. *Lancet Infect Dis* 5: 42–52.
7. Luby SP, Agboatwalla M, Painter J, Altaf A, Billhimer W, Keswick B, Hoekstra RM, 2006. Combining drinking water treatment and hand washing for diarrhoea prevention, a cluster randomised controlled trial. *Trop Med Int Health* 11: 479–89.
8. Ivers LC, Farmer PE, Pape WJ, 2012. Oral cholera vaccine and integrated cholera control in Haiti. *Lancet* 379: 2026–8.
9. Pan American Health Organization, 2012. Final report of the XX Technical Advisory Group (TAG) Meeting on Vaccine-preventable Diseases of the Pan American Health Organization, held in Washington, DC, October 2012.
10. Corso PS, Haddix AC, 2003. Time Effects. Prevention Effectiveness: A Guide to Decision Analysis and Economic Evaluation. New York: Oxford University Press.
11. Sobsey MD, Stauber CE, Casanova LM, Brown JM, Elliott MA, 2008. Point of use household drinking water filtration: A practical, effective solution for providing sustained access to safe drinking water in the developing world. *Environ Sci Technol* 42: 4261–7.
12. Makutsa P, Nzaku K, Ogutu P, Barasa P, Ombeki S, Mwaki A, Quick RE, 2001. Challenges in implementing a point-of-use water quality intervention in rural Kenya. *Am J Public Health* 91: 1571–3.
13. Ram PK, Kelsey E, Rasoatiana, Miarintsoa RR, Rakotomalala O, Dunston C, Quick RE, 2007. Bringing safe water to remote populations: an evaluation of a portable point-of-use intervention in rural Madagascar. *Am J Public Health* 97: 398–400.
